# Supplementary material
Source: Springer Nature journal article supplement (https://www.springermedizin.de/resource/supplementary/12936_2013_2764_MOESM4_ESM.pdf/9544214)
Supplement: MOESM4 [file 9544214]

Intervention period

Integrated IEC activities conducted

Free universal ACT introduced

Free universal ACT not sustained

LLIN distribution

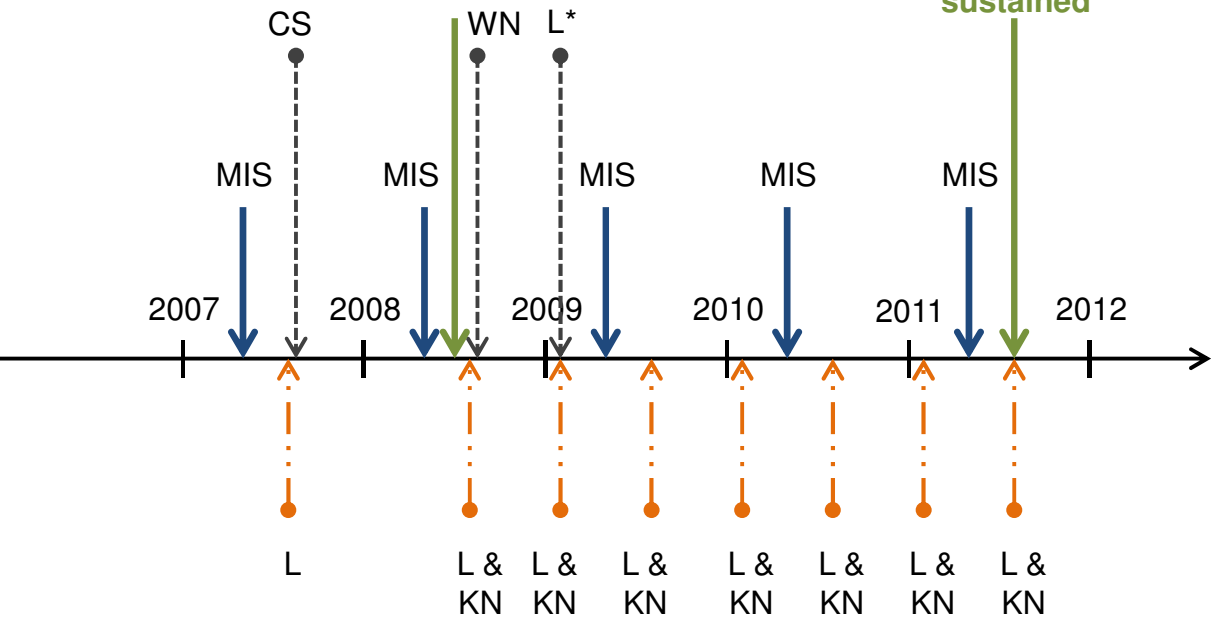

IRS spray rounds
